# Supplementary material
Source: PubMed Central journal article supplement (PMC3244472)

Type of file: figure

Label: Supplemental Figure 1

Filename: Combelles et al Reproduction Suppl Figure 1 for PubMed Central.tiff

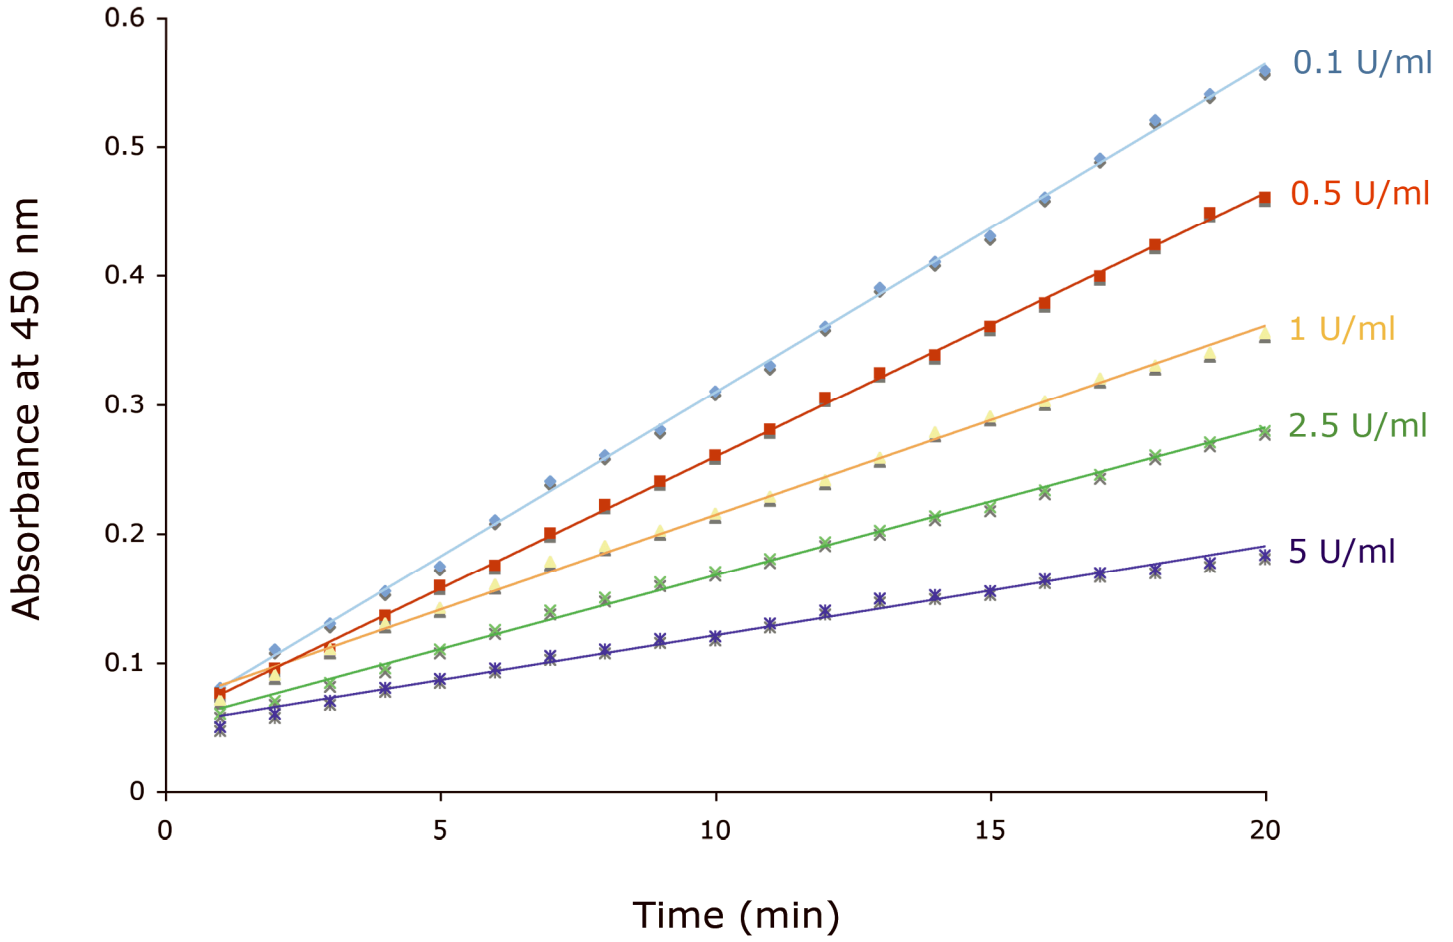

Type of file: figure

Label: Supplemental Figure 2

Filename: Combelles et al Reproduction Suppl Figure 2 for PubMed Central.tiff

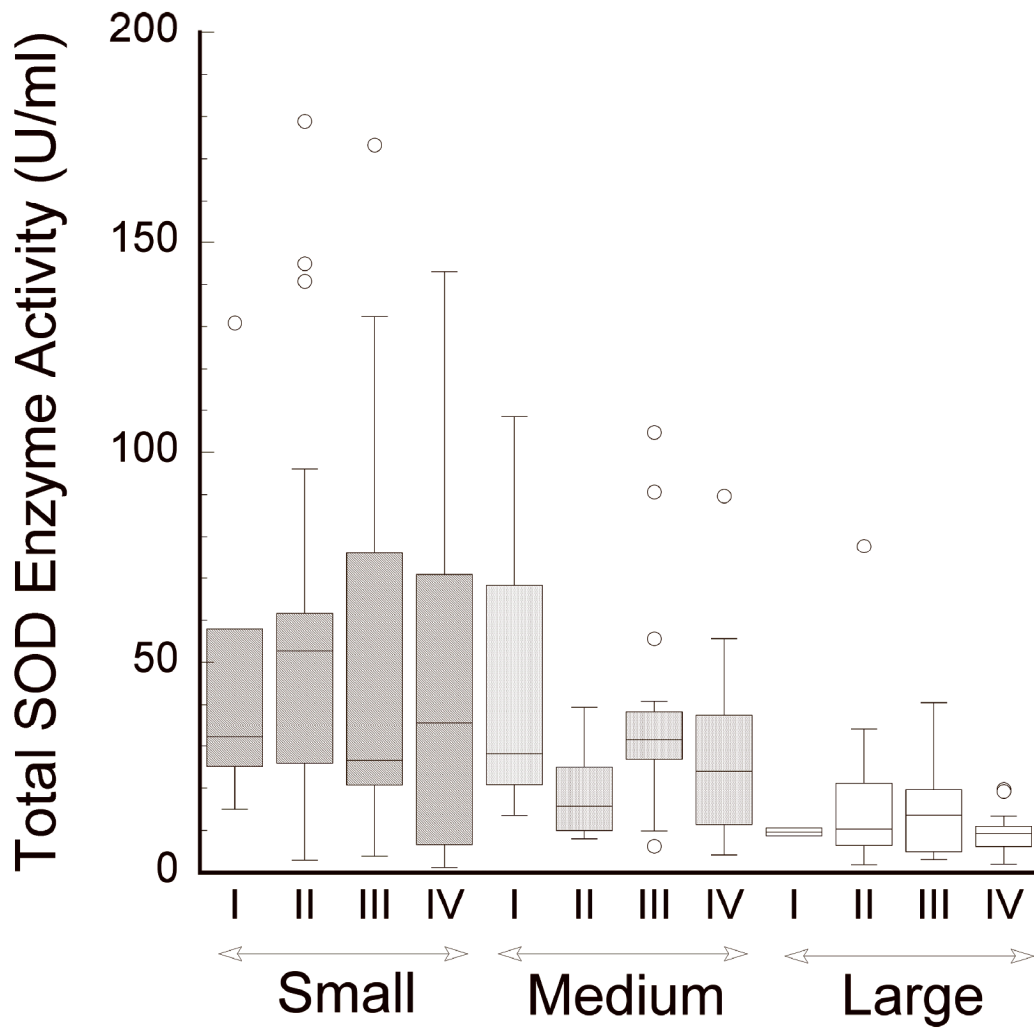

Supplement: NIHMS339968-supplement-supplement_1.pdf [file NIHMS339968-supplement-supplement_1.pdf]
